# Supplementary material
Source: PubMed Central journal article supplement (PMC4744100)
Supplement: NIHMS745539-supplement-125_2015_3835_MOESM1_ESM.pdf [file NIHMS745539-supplement-125_2015_3835_MOESM1_ESM.pdf]

**ESM Table 1:** Established HDL-C SNPs considered for the study and their MAF in Pima Indians

| SNP ID                  | Position <sup>a</sup> | Proxy SNP (r2) <sup>b</sup> | A1 | A2            | Locus <sup>c</sup>    | MAF_Pima | MAF_EUR <sup>d</sup> | Primary Trait <sup>e</sup> |
|-------------------------|-----------------------|-----------------------------|----|---------------|-----------------------|----------|----------------------|----------------------------|
| rs4660293               | chr1:40028180         | rs10127775 (r2=1)           | A  | G             | <i>PABPC4</i>         | 0.03     | 0.23                 | HDL-C                      |
| rs1689800               | chr1:182168885        |                             | A  | G             | <i>ZNF648</i>         | 0.16     | 0.35                 | HDL-C                      |
| rs4846914               | chr1:230295691        |                             | G  | A             | <i>GALNT2</i>         | 0.44     | 0.4                  | HDL-C                      |
| rs1042034               | chr2:21225281         |                             | C  | T             | <i>APOB</i>           | 0.21     | 0.22                 | TG                         |
| rs12328675              | chr2:165540800        |                             | C  | T             | <i>COBLL1</i>         | 0        | 0.13                 | HDL-C                      |
| rs2972146               | chr2:227100698        |                             | G  | T             | <i>IRS1</i>           | 0.001    | 0.37                 | HDL-C                      |
| rs13107325              | chr4:103188709        |                             | C  | T             | <i>SLC39A8</i>        | 0.003    | 0.07                 | HDL-C                      |
| rs6450176               | chr5:53298025         |                             | G  | A             | <i>ARL15</i>          | 0.23     | 0.26                 | HDL-C                      |
| rs2814944               | chr6:34552797         |                             | G  | A             | <i>C6ORF106</i>       | 0.003    | 0.16                 | HDL-C                      |
| rs605066                | chr6:139829666        |                             | C  | T             | <i>CITED2</i>         | 0.27     | 0.42                 | HDL-C                      |
| rs1084651               | chr6:161089817        |                             | A  | G             | <i>LPA</i>            | 0.003    | 0.16                 | HDL-C                      |
| rs17145738              | chr7:72982874         |                             | C  | T             | <i>MLXIPL</i>         | 0.11     | 0.12                 | TG                         |
| rs4731702               | chr7:130433384        |                             | C  | T             | <i>KLF14</i>          | 0.39     | 0.48                 | HDL-C                      |
| rs9987289               | chr8:9183358          |                             | A  | G             | <i>PPP1R3B</i>        | 0.24     | 0.09                 | HDL-C                      |
| rs7016529 <sup>f</sup>  | chr8:19806631         |                             | C  | T             | <i>LPL</i>            | 0        | 0.01                 | TG                         |
| rs12678919              | chr8:19844222         | G                           | A  | <i>LPL</i>    | 0.001                 | 0.12     | TG                   |                            |
| rs2293889               | chr8:116599199        | T                           | G  | <i>TRPS1</i>  | 0.24                  | 0.41     | HDL-C                |                            |
| rs10808546              | chr8:126495818        | C                           | T  | <i>TRIB1</i>  | 0.33                  | 0.44     | TG                   |                            |
| rs643531                | chr9:15296034         | C                           | A  | <i>TTC39B</i> | 0.004                 | 0.14     | HDL-C                |                            |
| rs11789603 <sup>f</sup> | chr9:107647019        | C                           | T  | <i>ABCA1</i>  | 0                     | 0.09     | HDL-C                |                            |
| rs1883025               | chr9:1076664301       | C                           | T  | <i>ABCA1</i>  | 0.39                  | 0.25     | HDL-C                |                            |
| rs2923084               | chr11:10388782        | A                           | G  | <i>AMPD3</i>  | 0.32                  | 0.17     | HDL-C                |                            |
| rs3136441               | chr11:46743247        | rs3136457 (r2=1)            | T  | C             | <i>LRP4</i>           | 0.36     | 0.15                 | HDL-C                      |
| rs174601                | chr11:61623140        |                             | C  | T             | <i>FADS1-2-3</i>      | 0.009    | 0.36                 | TG                         |
| rs964184                | chr11:116648917       |                             | G  | C             | <i>APOA1-C3-A4-A5</i> | 0.42     | 0.13                 | TG                         |
| rs12225230 <sup>f</sup> | chr11:116728630       |                             | G  | C             | <i>APOA1-C3-A4-A5</i> | 0.26     | 0.14                 | TG                         |
| rs7115089               | chr11:122530591       |                             | C  | G             | <i>UBASH3B</i>        | 0.36     | 0.37                 | TC                         |
| rs7134375               | chr12:20473758        |                             | C  | A             | <i>PDE3A</i>          | 0.46     | 0.42                 | HDL-C                      |

| SNP ID                  | Position <sup>a</sup> | Proxy SNP (r2) <sup>b</sup> | A1 | A2 | Locus <sup>c</sup> | MAF_Pima | MAF_EUR <sup>d</sup> | Primary Trait <sup>e</sup> |
|-------------------------|-----------------------|-----------------------------|----|----|--------------------|----------|----------------------|----------------------------|
| rs3741414               | chr12:57844049        |                             | C  | T  | <i>LRP1</i>        | 0.39     | 0.24                 | TG                         |
| rs7134594               | chr12:110000193       |                             | C  | T  | <i>MVK</i>         | 0.27     | 0.47                 | HDL-C                      |
| rs11057244 <sup>f</sup> | chr12:123773263       |                             | G  | C  | <i>ZNF664</i>      | 0.05     | 0.03                 | HDL-C                      |
| rs4759375               | chr12:123796238       |                             | T  | C  | <i>SBNO1</i>       | 0        | 0.06                 | HDL-C                      |
| rs4765127               | chr12:124460167       |                             | G  | T  | <i>ZNF664</i>      | 0.2      | 0.34                 | HDL-C                      |
| rs838880                | chr12:125261593       |                             | C  | T  | <i>SCARB1</i>      | 0.42     | 0.31                 | HDL-C                      |
| rs1532085               | chr15:58683366        |                             | A  | G  | <i>LIPC</i>        | 0.37     | 0.39                 | HDL-C                      |
| rs2070895 <sup>f</sup>  | chr15:58723939        | rs1077834 (r2=1)            | G  | A  | <i>LIPC</i>        | 0.14     | 0.21                 | HDL-C                      |
| rs2652834               | chr15:63396867        |                             | A  | G  | <i>LACTB</i>       | 0        | 0.2                  | HDL-C                      |
| rs3764261               | chr16:56993324        | rs17231506 (r2=0.98)        | C  | A  | <i>CETP</i>        | 0.29     | 0.32                 | HDL-C                      |
| rs9939224 <sup>f</sup>  | chr16:57002732        | rs12720922 (r2=0.94)        | G  | T  | <i>CETP</i>        | 0.35     | 0.76                 | HDL-C                      |
| rs16942887              | chr16:67928042        |                             | G  | A  | <i>LCAT</i>        | 0.16     | 0.12                 | HDL-C                      |
| rs2925979               | chr16:81534790        |                             | T  | C  | <i>CMIP</i>        | 0.05     | 0.3                  | HDL-C                      |
| rs4148008               | chr17:6687294         |                             | C  | G  | <i>ABCA8</i>       | 0.25     | 0.32                 | HDL-C                      |
| rs11869286              | chr17:37813856        |                             | G  | C  | <i>STARD3</i>      | 0.44     | 0.34                 | HDL-C                      |
| rs4129767               | chr17:76403984        |                             | G  | A  | <i>PGS1</i>        | 0.42     | 0.49                 | HDL-C                      |
| rs7241918               | chr18:47160953        |                             | G  | T  | <i>LIPG</i>        | 0        | 0.17                 | HDL-C                      |
| rs2040293 <sup>e</sup>  | chr18:47278345        |                             | G  | A  | <i>LIPG</i>        | 0.32     | 0.26                 | HDL-C                      |
| rs12967135              | chr18:57849023        |                             | G  | A  | <i>MC4R</i>        | 0.005    | 0.23                 | HDL-C                      |
| rs7255436               | chr19:8433196         |                             | C  | A  | <i>ANGPTL4</i>     | 0.42     | 0.45                 | HDL-C                      |
| rs737337 <sup>f</sup>   | chr19:11347493        | rs56322906 (r2=1)           | T  | C  | <i>LOC55908</i>    | 0.49     | 0.08                 | HDL-C                      |
| rs4420638               | chr19:45422946        |                             | A  | G  | <i>APOE</i>        | 0.01     | 0.17                 | LDL-C                      |
| rs5167 <sup>e</sup>     | chr19:45448465        |                             | T  | G  | <i>APOE-C1-C2</i>  | 0.49     | 0.37                 | LDL-C                      |
| rs386000                | chr19:54792761        |                             | G  | C  | <i>LILRA3</i>      | 0.21     | 0.2                  | HDL-C                      |
| rs1800961 <sup>g</sup>  | chr20:43042634        |                             | C  | T  | <i>HNF4A</i>       | 0.04     | 0.03                 | HDL-C                      |
| rs6065906               | chr20:44554015        |                             | T  | C  | <i>PLTP</i>        | 0.005    | 0.18                 | HDL-C                      |
| rs181362                | chr22:21932068        |                             | C  | T  | <i>UBE2L3</i>      | 0.27     | 0.2                  | HDL-C                      |

MAF\_Pima: minor allele frequency as determined by previously analyzed whole genome sequence data in 335 Pima Indians, MAF\_EUR: MAF in subjects of European ancestry, A1: Reference allele, A2: Alternate allele.

<sup>a</sup> Position is based on genome build 37.

<sup>b</sup> Proxy SNP used for the actual analysis and  $r^2$  with the GWAS index SNP.

<sup>c</sup> Locus based on Teslovich et al. [7].

<sup>d</sup> Minor allele frequency in Europeans from teslovich et al [7]

<sup>e</sup> Primary lipid trait at the locus based on Teslovich et al. [7].

<sup>f</sup> Minor allele frequency in Europeans from 1000 genome data.

<sup>g</sup> rs1800961 is a missense variant and was included for further analysis even though it had a MAF=0.04.
