# Supplementary material
Source: PubMed Central journal article supplement (PMC4744100)
Supplement: NIHMS745539-supplement-125_2015_3835_MOESM2_ESM.pdf [file NIHMS745539-supplement-125_2015_3835_MOESM2_ESM.pdf]

**ESM Table 2:** GIANT Consortium 2012-2015 GWAS Metadata lookup for 28 HDL-C SNPs.

| SNP ID                 | Position <sup>a</sup> | A1 <sup>b</sup> | A2 <sup>b</sup> | Locus <sup>c</sup> | BMI_GIANT_all <sup>d</sup> |                      | WHRadjBMI_GIANT_all <sup>d</sup> |                       |
|------------------------|-----------------------|-----------------|-----------------|--------------------|----------------------------|----------------------|----------------------------------|-----------------------|
|                        |                       |                 |                 |                    | Beta                       | <i>p</i> value       | Beta                             | <i>p</i> value        |
| rs1689800              | chr1:182168885        | G               | A               | <i>ZNF648</i>      | 0.0007                     | 0.8249               | -0.005                           | 0.16                  |
| rs4846914 <sup>e</sup> | chr1:230295691        | G               | A               | <i>GALNT2</i>      | 0.0042                     | 0.1574               | -0.0054                          | 0.11                  |
| rs6450176              | chr5:53298025         | G               | A               | <i>ARL15</i>       | 0.0101                     | 0.002775             | 0.0092                           | 0.015                 |
| rs605066               | chr6:139829666        | C               | T               | <i>CITED2</i>      | 0.0018                     | 0.6266               | 0.021                            | 2.5×10 <sup>-6</sup>  |
| rs4731702              | chr7:130433384        | C               | T               | <i>KLF14</i>       | -0.009                     | 0.002044             | 0.0041                           | 0.22                  |
| rs2293889              | chr8:116599199        | T               | G               | <i>TRPS1</i>       | 0.0116                     | 1.7×10 <sup>-4</sup> | 0.0028                           | 0.42                  |
| rs9987289              | chr8:9183358          | A               | G               | <i>PPP1R3B</i>     | 0.0016                     | 0.7598               | 0.018                            | 0.0023                |
| rs1883025              | chr9:1076664301       | C               | T               | <i>ABCA1</i>       | -0.0079                    | 0.02578              | 0.012                            | 0.0018                |
| rs2923084              | chr11:10388782        | A               | G               | <i>AMPD3</i>       | 0.0027                     | 0.4891               | -0.0015                          | 0.73                  |
| rs3136441 <sup>e</sup> | chr11:46743247        | C               | T               | <i>LRP4</i>        | -0.0146                    | 6.2×10 <sup>-4</sup> | 0.0066                           | 0.16                  |
| rs7134594              | chr12:110000193       | C               | T               | <i>MVK</i>         | -0.0078                    | 0.03026              | 0.005                            | 0.23                  |
| rs4765127              | chr12:124460167       | G               | T               | <i>ZNF664</i>      | -0.0118                    | 0.002481             | 0.031                            | 1.0×10 <sup>-11</sup> |
| rs838880               | chr12:125261593       | C               | T               | <i>SCARB1</i>      | -0.0051                    | 0.1182               | 0.0068                           | 0.062                 |
| rs7134375              | chr12:20473758        | A               | C               | <i>PDE3A</i>       | 0.0114                     | 1.2×10 <sup>-4</sup> | -0.0049                          | 0.15                  |
| rs1532085              | chr15:58683366        | G               | A               | <i>LIPC</i>        | 0.0008                     | 0.7832               | 0.005                            | 0.14                  |
| rs2070895 <sup>e</sup> | chr15:58723939        | G               | A               | <i>LIPC</i>        | 0.0045                     | 0.3279               | -0.0005                          | 0.92                  |
| rs3764261 <sup>e</sup> | chr16:56993324        | A               | C               | <i>CETP</i>        | 0.0007                     | 0.8404               | 0.0033                           | 0.38                  |
| rs9939224 <sup>e</sup> | chr16:57002732        | G               | T               | <i>CETP</i>        | -0.0053                    | 0.3081               | -0.0072                          | 0.23                  |
| rs16942887             | chr16:67928042        | G               | A               | <i>LCAT</i>        | 0.011                      | 0.01403              | 0.0068                           | 0.17                  |
| rs11869286             | chr17:37813856        | C               | G               | <i>STARD3</i>      | 0.0045                     | 0.1529               | 0.0063                           | 0.076                 |
| rs4148008              | chr17:6687294         | G               | C               | <i>ABCA8</i>       | -0.0019                    | 0.5501               | 0.0052                           | 0.15                  |
| rs4129767              | chr17:76403984        | A               | G               | <i>PGS1</i>        | -0.0009                    | 0.7706               | 0.0007                           | 0.84                  |
| rs2040293              | chr18:47278345        | G               | A               | <i>LIPG</i>        | 0.0035                     | 0.2983               | 0.0044                           | 0.24                  |
| rs737337 <sup>e</sup>  | chr19:11347493        | C               | T               | <i>LOC55908</i>    | -0.0036                    | 0.4825               | 0.01                             | 0.071                 |
| rs386000               | chr19:54792761        | C               | G               | <i>LILRA3</i>      | -0.0061                    | 0.1262               | 0.0017                           | 0.71                  |
| rs7255436              | chr19:8433196         | C               | A               | <i>ANGPTL4</i>     | 0.0024                     | 0.5166               | 0.006                            | 0.17                  |
| rs1800961              | chr20:43042634        | T               | C               | <i>HNF4A</i>       | -0.0015                    | 0.8679               | -0.0014                          | 0.89                  |
| rs181362               | chr22:21932068        | T               | C               | <i>UBE2L3</i>      | 0.0146                     | 4.5×10 <sup>-5</sup> | 0.0069                           | 0.08                  |

<sup>a</sup> Position is based on genome build 37.

<sup>b</sup> Allele 1 and 2 based on GIANT 2012-2015 Metadata

([https://www.broadinstitute.org/collaboration/giant/index.php/GIANT\\_consortium\\_data\\_files](https://www.broadinstitute.org/collaboration/giant/index.php/GIANT_consortium_data_files) accessed 1 September 2015).

<sup>c</sup> Locus is based on Teslovich et al. (7).

<sup>d</sup> *p* values and regression coefficient from GIANT consortium 2012-2015 GWAS Metadata (All ancestries) for BMI and Waist to Hip ratio adjusted for BMI(WHRadjBMI). SNPs with *P* values < 0.0018 (0.05/28)

achieve Bonferroni corrected significance for association with BMI and WHRadjBMI and were omitted from subsequent analysis.

<sup>e</sup> The GWAS index variant was used to look up the GIANT data which was substituted by a close proxy (see ESM Table 1) for subsequent analysis.
